# Supplementary material for: Several structural motifs cooperate in determining the highly effective anti-thrombin activity of NU172 aptamer
Source: PubMed Central journal article supplement — Nucleic Acids Res. 2018 Oct 24;46(22):12177–85. doi: 10.1093/nar/gky990 (PMC6294562; doi:10.1093/nar/gky990), 2018-10-24
Supplement: gky990_supplemental_files.pdf [file gky990_supplemental_files.pdf]

Supplementary Material for

**Several structural motifs cooperate in determining the highly effective anti-thrombin activity of NU172 aptamer**

Romualdo Troisi, Valeria Napolitano, Vera Spiridonova, Irene Russo Krauss and Filomena Sica

Correspondence: [filomena.sica@unina.it](mailto:filomena.sica@unina.it)

## Table of Contents:

|                                                                                                      |    |
|------------------------------------------------------------------------------------------------------|----|
| Table of Contents                                                                                    | 2  |
| Supplementary Tables                                                                                 | 3  |
| Table S1 (Diffraction data statistics)                                                               | 3  |
| Table S2 (Summary of refinement statistics)                                                          | 4  |
| Table S3 (Comparison of interface interactions and areas among different thrombin-aptamer complexes) | 5  |
| Table S4 (Anticoagulant properties of different oligonucleotides)                                    | 6  |
| Supplementary Figures                                                                                | 7  |
| Figure S1 (Sequences of the different oligonucleotides)                                              | 7  |
| Figure S2 (Crystals of thrombin–NU172–K and thrombin–NU172–Na complexes)                             | 7  |
| Figure S3 (Surface/cartoon representation of thrombin-NU172-Na complex)                              | 8  |
| Figure S4 (Electron density map of the sugar chain linked to asparagine 60G)                         | 8  |
| Figure S5 (Electron density map of the whole NU172 aptamer)                                          | 9  |
| Figure S6 (Schematic representation of NU172 aptamer)                                                | 10 |
| Figure S7 (Cartoon/surface views of thrombin-NU172 and thrombin-TBA interfaces)                      | 11 |

## Supplementary Tables

Table S1. Diffraction data statistics.

|                                                      | Thrombin–NU172–K                       | Thrombin–NU172–Na                      |
|------------------------------------------------------|----------------------------------------|----------------------------------------|
| <b>Space group</b>                                   | I222                                   | I222                                   |
| <b>Unit-cell parameters</b>                          |                                        |                                        |
| <b>a (Å)</b>                                         | 67.88                                  | 67.33                                  |
| <b>b (Å)</b>                                         | 113.60                                 | 120.69                                 |
| <b>c (Å)</b>                                         | 208.03                                 | 208.94                                 |
| <b>α (deg)</b>                                       | 90.00                                  | 90.00                                  |
| <b>β (deg)</b>                                       | 90.00                                  | 90.00                                  |
| <b>γ (deg)</b>                                       | 90.00                                  | 90.00                                  |
| <b>Resolution limits (Å)</b>                         | 104.02-2.50 (2.59-2.50) <sup>[a]</sup> | 104.51-2.80 (2.95-2.80) <sup>[a]</sup> |
| <b>No. of observations</b>                           | 1816277                                | 84545                                  |
| <b>No. of unique reflections</b>                     | 26684                                  | 21199                                  |
| <b>Completeness (%)</b>                              | 93.8 (64.7)                            | 99.0 (99.4)                            |
| <b>&lt;I/σ(I)&gt;</b>                                | 14.7 (2.6)                             | 12.4 (3.9)                             |
| <b>Average multiplicity</b>                          | 5.3 (3.1)                              | 4.0 (4.2)                              |
| <b>R<sub>merge</sub><sup>[b]</sup> (%)</b>           | 7.9 (31.7)                             | 6.7 (34.0)                             |
| <b>V<sub>M</sub> (Å<sup>3</sup> Da<sup>-1</sup>)</b> | 4.47                                   | 4.73                                   |
| <b>No. of molecules in the asymmetric unit</b>       | 1                                      | 1                                      |
| <b>Solvent content (%)</b>                           | 74.7                                   | 76.1                                   |

[a] Values in brackets refer to the highest resolution shell.

[b]  $R_{\text{merge}} = \frac{\sum_{hkl} \sum_i |I_i(hkl) - \langle I(hkl) \rangle|}{\sum_{hkl} \sum_i I_i(hkl)}$ , where  $I_i(hkl)$  is the  $i$ th intensity measurement of the reflection  $hkl$ , including symmetry-related reflections, and  $\langle I(hkl) \rangle$  is its average.

Table S2. Summary of refinement statistics.

|                                                          | Thrombin–NU172–K | Thrombin–NU172–Na |
|----------------------------------------------------------|------------------|-------------------|
| <b>Resolution (Å)</b>                                    | 104.02-2.50      | 104.51-2.80       |
| <b>No. of reflections</b>                                | 25367            | 20089             |
| <b>R<sub>factor</sub>/R<sub>free</sub><sup>[a]</sup></b> | 0.169/0.205      | 0.159/0.203       |
| <b>No. of atoms</b>                                      |                  |                   |
| <b>Total</b>                                             | 3183             | 3146              |
| <b>Protein</b>                                           | 2367             | 2360              |
| <b>Aptamer</b>                                           | 543              | 543               |
| <b>Ions</b>                                              | 2                | 2                 |
| <b>Carbohydrates</b>                                     | 106              | 95                |
| <b>Waters</b>                                            | 129              | 110               |
| <b>Average B factor (Å<sup>2</sup>)</b>                  |                  |                   |
| <b>Overall</b>                                           | 49.15            | 53.14             |
| <b>Protein</b>                                           | 42.22            | 45.61             |
| <b>Aptamer</b>                                           | 78.47            | 77.40             |
| <b>Ions</b>                                              | 47.98            | 41.95             |
| <b>Carbohydrates</b>                                     | 70.56            | 116.73            |
| <b>Waters</b>                                            | 38.74            | 42.66             |
| <b>RMSD from ideal values</b>                            |                  |                   |
| <b>Bond lengths (Å)</b>                                  | 0.01             | 0.01              |
| <b>Bond angles (deg)</b>                                 | 1.48             | 1.18              |
| <b>Ramachandran plot, residues in (%)</b>                |                  |                   |
| <b>Most favoured region</b>                              | 97.2             | 95.8              |
| <b>Additionally allowed region</b>                       | 2.8              | 4.2               |
| <b>Generously allowed region</b>                         | 0                | 0                 |
| <b>PDB code</b>                                          | 6EVV             | 6GN7              |

[a]  $R_{\text{factor}} = \frac{\sum_{hkl} ||F_o| - |F_c||}{\sum_{hkl} |F_o|}$ , where  $F_o$  and  $F_c$  represent the observed and calculated structure factors, respectively. The  $R_{\text{factor}}$  was calculated using 95% of the data, which were included in refinement, and  $R_{\text{free}}$  was calculated using 5% of the data, which were excluded from refinement.

Table S3. Comparison of interface interactions and areas among thrombin-TBA-K, -TBA-Na, -mTBA, -RE31 (PDB codes: 4DII, 4DIH, 3QLP, 5CMX, respectively), -NU172-K and -NU172-Na complexes, calculated by Contact, CoCoMaps and PISA programs. The threshold distance to select interacting residues was 3.9 Å and 5.0 Å in Contact and in CoCoMaps, respectively.

|                                                 | TBA-K                             | TBA-Na                                     | mTBA                                       | RE31                              | NU172-K                                                      | NU172-Na                                            |
|-------------------------------------------------|-----------------------------------|--------------------------------------------|--------------------------------------------|-----------------------------------|--------------------------------------------------------------|-----------------------------------------------------|
| <b>Contact</b>                                  |                                   |                                            |                                            |                                   |                                                              |                                                     |
| <b>Thy A/Gua (in A-region)</b>                  | Ile24<br>His71<br>Ile79<br>Tyr117 | Ile24<br>Arg75<br>Glu77<br>Ile79<br>Tyr117 | Ile24<br>Arg75<br>Glu77<br>Ile79<br>Tyr117 | Ile24<br>Glu77<br>Ile79<br>Tyr117 | Ile24<br>Gly69<br>His71<br>Arg75<br>Glu77<br>Ile79<br>Tyr117 | Ile24<br>His71<br>Arg75<br>Glu77<br>Ile79<br>Tyr117 |
| <b>Thy B (in A-region)</b>                      | Arg75<br>Arg77A<br>Asn78<br>Ile79 | Arg75<br>Arg77A<br>Asn78<br>Ile79          | Arg75<br>Arg77A<br>Asn78<br>Ile79          | Arg75<br>Arg77A<br>Asn78<br>Ile79 | Arg75<br>Arg77A<br>Asn78<br>Ile79                            | Arg75<br>Arg77A<br>Asn78<br>Ile79                   |
| <b>Thy C (in B-region)</b>                      | Tyr76                             | Tyr76<br>Ile82                             | Gln38<br>Leu65<br>Tyr76                    | Tyr76                             | Tyr76<br>Ile82                                               | Tyr76<br>Ile82                                      |
| <b>Thy D (in B-region)</b>                      | Thr74<br>Arg75<br>Tyr76<br>Arg77A | Arg75<br>Tyr76<br>Arg77A                   | Arg75<br>Tyr76<br>Arg77A                   | Arg75<br>Tyr76<br>Arg77A          | Arg75<br>Tyr76<br>Arg77A                                     | Arg75<br>Tyr76<br>Arg77A                            |
| <b>Gua (G-quadruplex)</b>                       | Arg75<br>Arg77A<br>Asn78          | Thr74<br>Arg75<br>Arg77A                   | Arg75<br>Arg77A<br>Asn78                   | Thr74<br>Arg75<br>Arg77A<br>Asn78 | Arg75<br>Arg77A<br>Asn78                                     | Arg75<br>Arg77A                                     |
| <b>Gua (GTA loop)</b>                           |                                   |                                            |                                            |                                   | Arg75                                                        | Arg75                                               |
| <b>CoCoMaps</b>                                 |                                   |                                            |                                            |                                   |                                                              |                                                     |
| <b>Interface area (Å<sup>2</sup>)</b>           | 540                               | 563                                        | 663                                        | 553                               | 591                                                          | 588                                                 |
| <b>Polar Interface area (Å<sup>2</sup>)</b>     | 269                               | 288                                        | 337                                        | 283                               | 316                                                          | 316                                                 |
| <b>Non polar Interface area (Å<sup>2</sup>)</b> | 271                               | 276                                        | 326                                        | 270                               | 274                                                          | 272                                                 |
| <b>N° interacting residues thrombin</b>         | 10                                | 11                                         | 14                                         | 12                                | 13                                                           | 13                                                  |
| <b>N° interacting residues aptamer</b>          | 8                                 | 8                                          | 8                                          | 8                                 | 9                                                            | 9                                                   |
| <b>N° hydrophilic-hydrophobic interaction</b>   | 3                                 | 5                                          | 6                                          | 5                                 | 5                                                            | 5                                                   |
| <b>N° hydrophilic-hydrophilic interaction</b>   | 18                                | 20                                         | 23                                         | 20                                | 22                                                           | 21                                                  |
| <b>PISA</b>                                     |                                   |                                            |                                            |                                   |                                                              |                                                     |
| <b>Interface area (Å<sup>2</sup>)</b>           | 543                               | 565                                        | 657                                        | 552                               | 590                                                          | 589                                                 |
| <b>H-bonds</b>                                  | 11                                | 12                                         | 11                                         | 10                                | 11                                                           | 9                                                   |

Table S4. Anticoagulant properties of different oligonucleotides expressed as ratio between coagulation rate in the presence of thrombin and oligonucleotide and in the only presence of thrombin.

|                  | Thrombin:oligonucleotide ratio |      |      |
|------------------|--------------------------------|------|------|
|                  | 1:1                            | 1:2  | 1:5  |
| <b>TBA</b>       | N.D.                           | 2    | 8    |
| <b>NU172</b>     | 200                            | 1000 | N.D. |
| <b>Des_NU172</b> | N.D.                           | 2    | 7    |
| <b>TBA_GT</b>    | N.D.                           | 3    | 7    |

Supplementary Figures

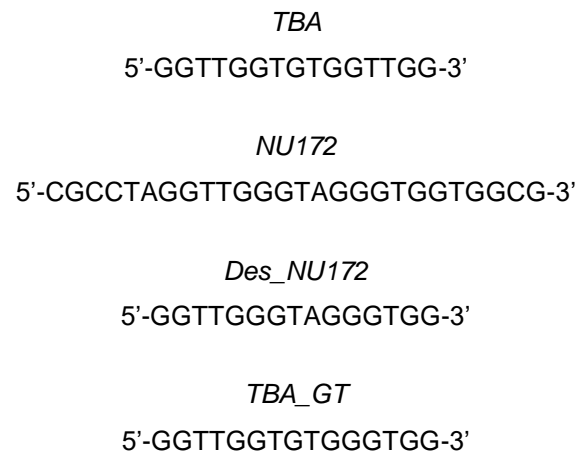

Figure S1. Sequences of the different oligonucleotides.

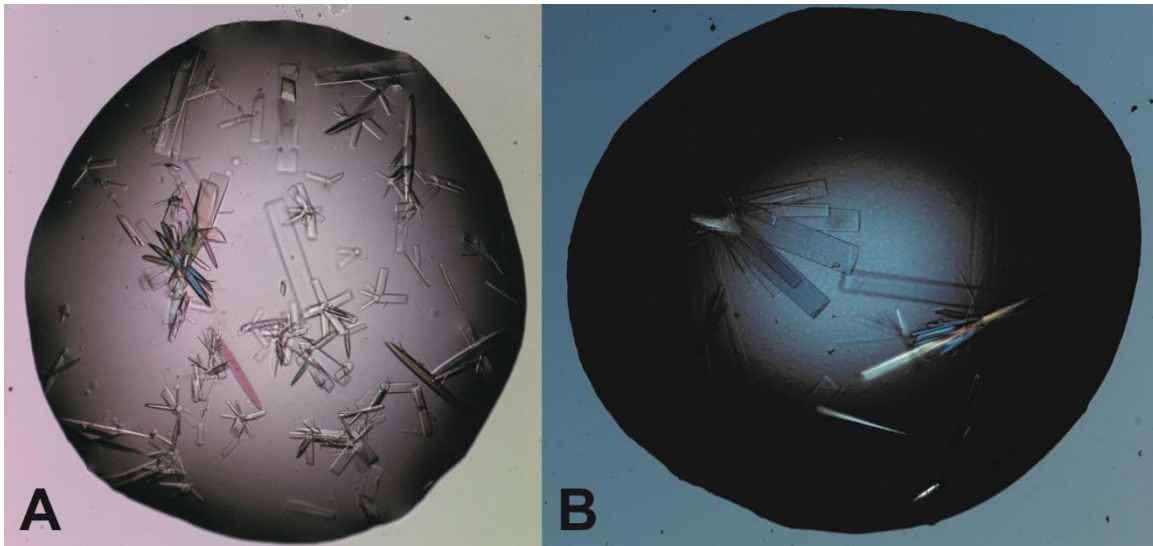

Figure S2. Crystals of thrombin–NU172–K (A) and thrombin–NU172–Na (B) complexes, grown in 50% (v/v) Tacsimate™ at pH 7.0. The diameter of the drops is 2.00 mm and the larger crystals are 0.50 mm x 0.07 mm, approximately.

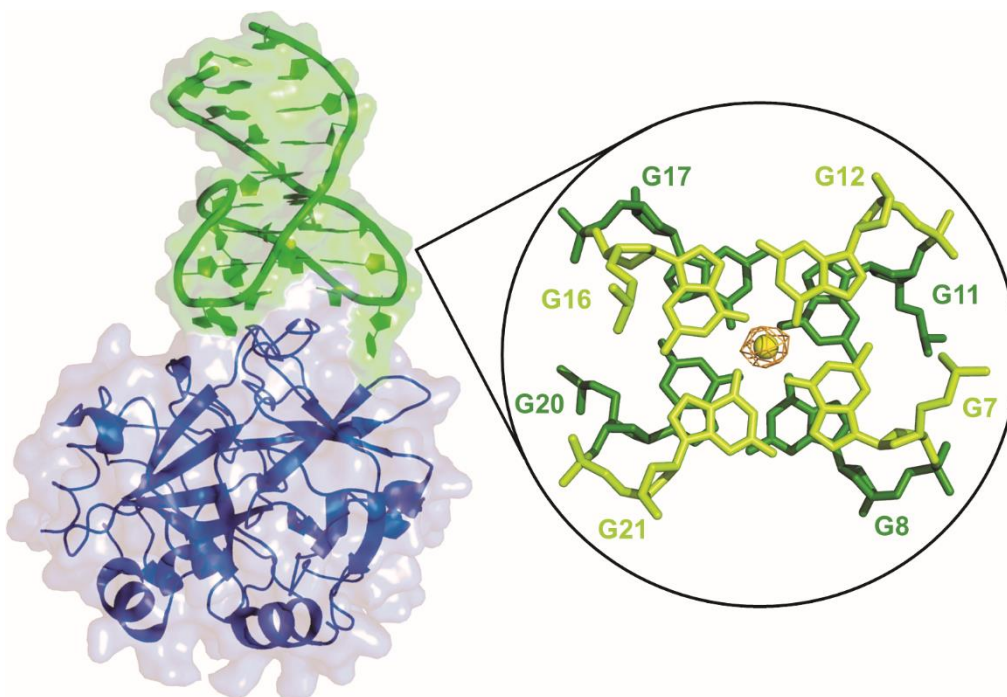

Figure S3. On the left, surface/cartoon representation of thrombin-NU172-Na complex. Thrombin is coloured in blue and the aptamer is coloured in green. On the right, view of the two tetrads along the G-quadruplex axis with the omit  $F_o - F_c$  electron density map (orange) of the sodium ion (yellow) contoured at  $3.0 \sigma$  level.

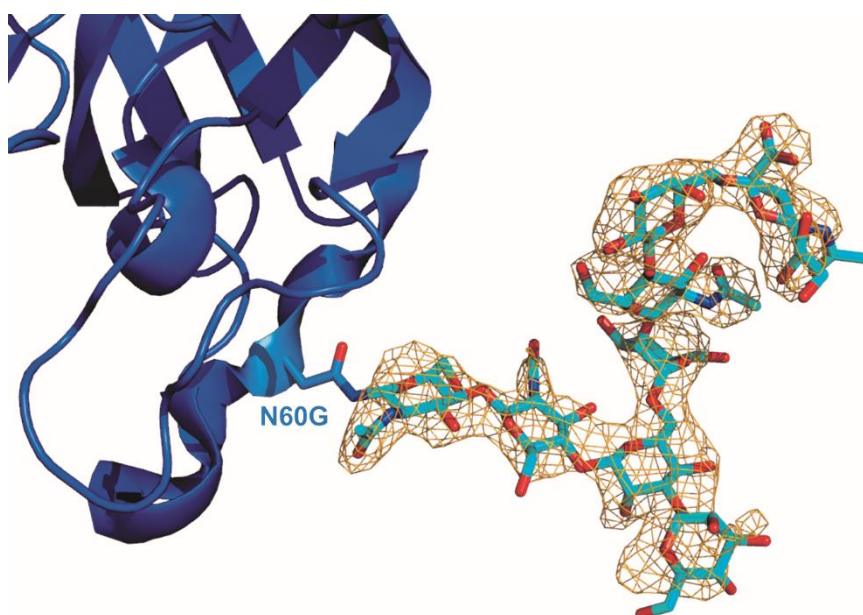

Figure S4. Omit  $F_o - F_c$  electron density map of the sugar chain linked to asparagine 60G contoured at  $3.0 \sigma$  level.



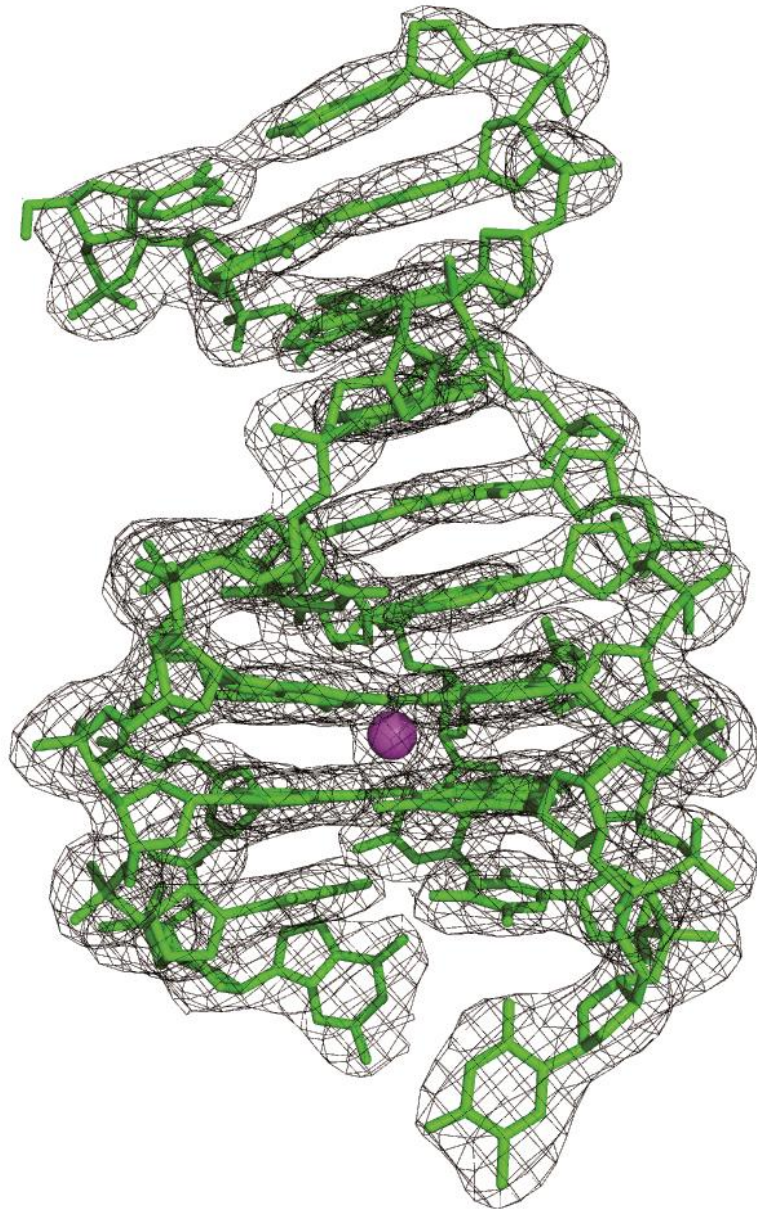

Figure S5.  $2F_o - F_c$  electron density map (grey) of the whole NU172 aptamer (green) in thrombin-NU172-K complex contoured at  $1.0 \sigma$  level. The potassium ion between the two tetrads of the G-quadruplex is coloured in magenta.

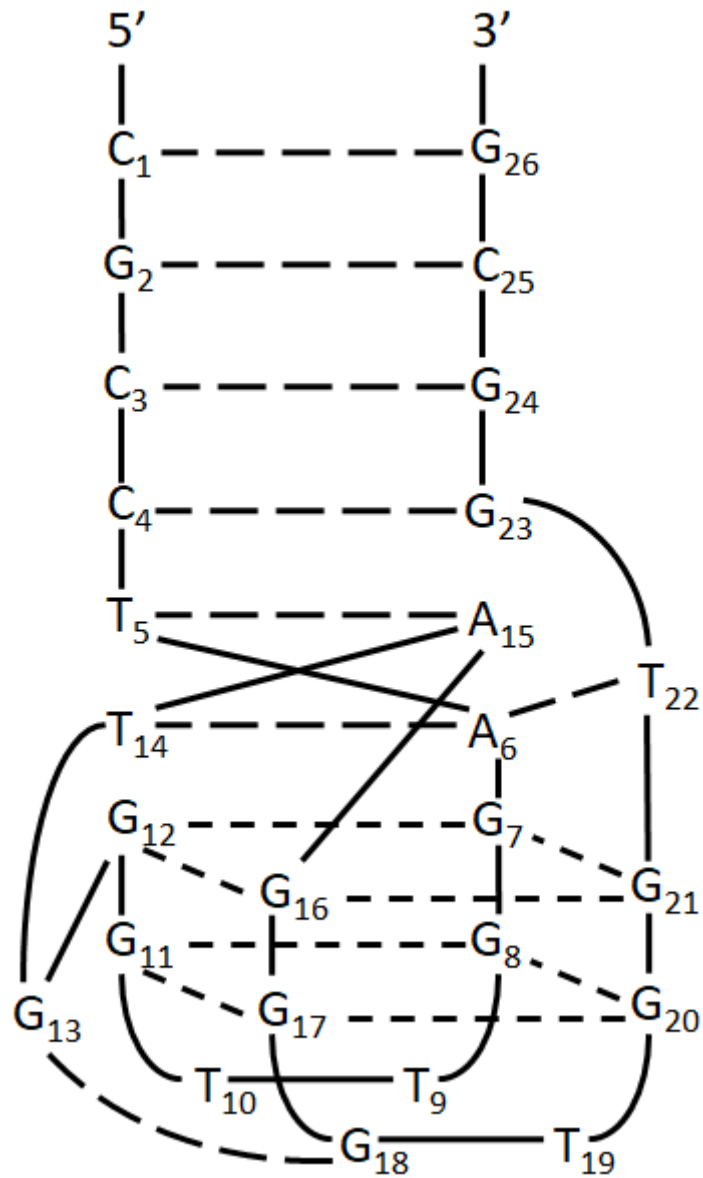

Figure S6. Schematic representation of NU172 organization when in complex with thrombin. Hydrogen bonds between bases are represented by dashed lines.

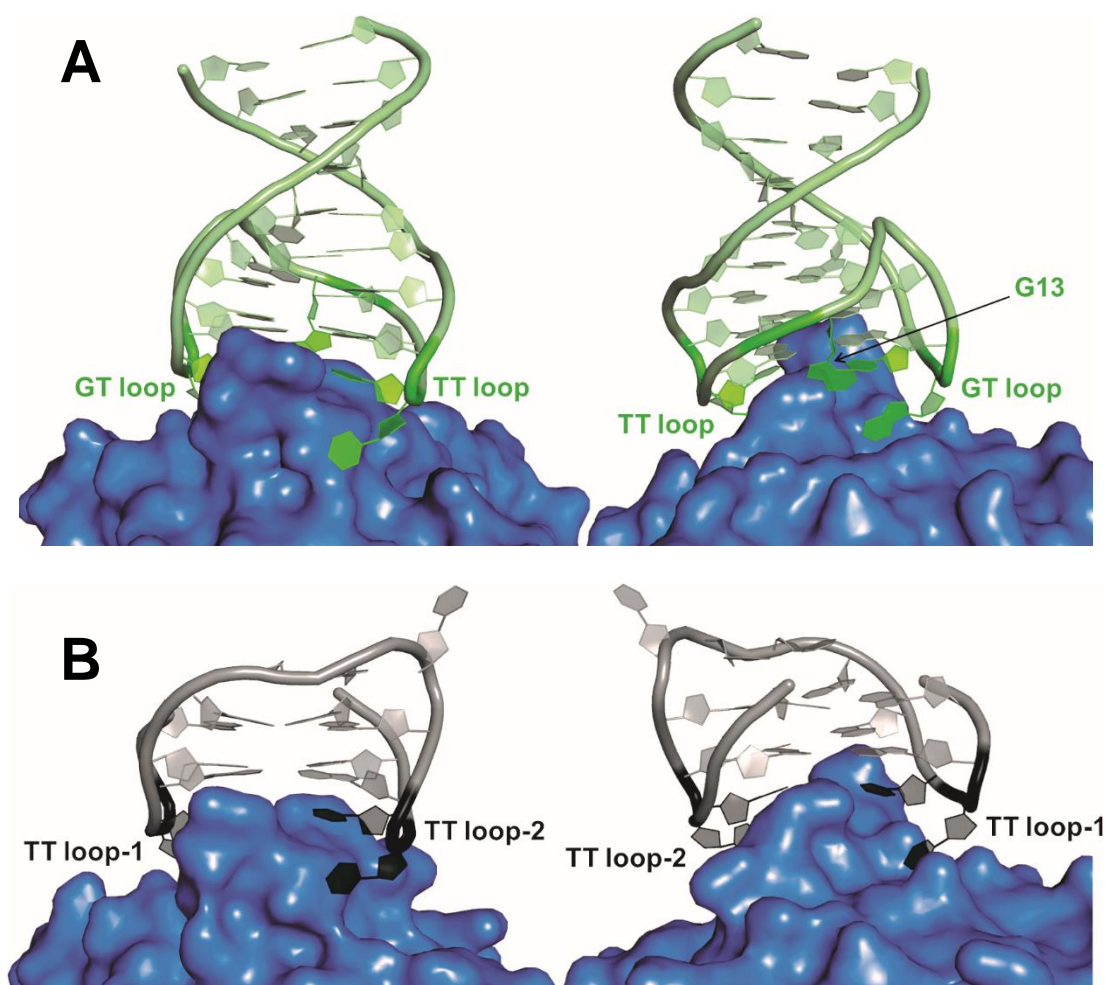

Figure S7. Cartoon/surface views of thrombin-NU172 (thrombin-NU172-K) (A) and thrombin-TBA (PDB code: 4DII) (B) interfaces. NU172 and TBA bind thrombin with a pincer-like system formed by the Thy9-Thy10 (TT loop) and the Gua18-Thy19 (GT loop) loops or by the Thy3-Thy4 (TT loop-1) and the Thy12-Thy13 (TT loop-2) loops, respectively. The interactions at B-region of exosite I, involving the TT loop of NU172 and the TT loop-2 of TBA are very similar. On the contrary, at A-region the presence in NU172 of a bulkier purine and the involvement of Gua13 (GTA loop) in the binding differentiate the two recognition motifs. Thrombin surface is coloured in blue, NU172 is coloured in green and TBA is coloured in black.
